# Supplementary material for: Association of Administration of Surfactant Using Less Invasive Methods With Outcomes in Extremely Preterm Infants Less Than 27 Weeks of Gestation
Source: PubMed Central journal article supplement (PMC9364126; doi:10.1001/jamanetworkopen.2022.25810), 2022-08-09
Supplement: jamanetwopen-e2225810-s001.pdf [file jamanetwopen-e2225810-s001.pdf]

## Supplemental Online Content

Härtel C, Herting E, Humberg A; German Neonatal Network. Association of administration of surfactant using less invasive methods with outcomes in extremely preterm infants less than 27 weeks of gestation. *JAMA Netw Open*. 2022;5(8):e2225810. doi:10.1001/jamanetworkopen.2022.25810

**eTable 1.** Clinical Characteristics of Nonenrolled vs Enrolled Infants

**eTable 2.** Outcomes of Nonenrolled vs Enrolled Infants per Gestational Week

This supplemental material has been provided by the authors to give readers additional information about their work.

**eTable 1.** Clinical Characteristics of Nonenrolled Versus Enrolled Infants

| <b>Gestational week</b>                            | <b>Non enrolled infants</b> | <b>Enrolled infants</b> | <b>p</b> |
|----------------------------------------------------|-----------------------------|-------------------------|----------|
| <b>Number of infants</b>                           | 2832                        | 6546                    |          |
| <b>Gestational age, mean/SD, wk</b>                | 24.9/1.3                    | 25.3/1.1                | <0.001*  |
| <b>Birth weight, mean/SD, g</b>                    | 680/250                     | 718/180                 | <0.001*  |
| <b>Sex, female, n, %</b>                           | 1242, 44.1                  | 3035, 46.4              | 0.039    |
| <b>Multiple birth, n, %</b>                        | 707, 25.2                   | 1989, 30.4              | <0.001   |
| <b>SGA, n, %</b>                                   | 597, 21.3                   | 1113, 17.0              | <0.001   |
| <b>Inborn, n, %</b>                                | 2674, 95.2                  | 6098, 96.4              | 0.015    |
| <b>BPD, n; % (95%CI)</b>                           | 372, 13.5 (12-15)           | 2479, 37.9 (37-39)      | <0.001   |
| <b>BPD or death, n, % (95%CI)</b>                  | 1754, 62.4 (61-64)          | 2984, 45.6 (44-47)      | <0.001   |
| <b>Death in hospital, all cause, n, % (95%CI),</b> | 1428, 50.9 (49-53)          | 613, 9.4 (9-10)         | <0.001   |
| <b>ICH, n, % (95%CI)</b>                           | 1038, 39.7 (38-42)          | 2173, 33.3 (32-34)      | <0.001   |

Non-enrolled: 2821/2832 baseline datasets were available for all items except BPD (2764) and ICH (2617); enrolled: 6545/6546 full datasets available except for ICH (6258). P-values were derived from chi-square test

**eTable 2.** Outcomes of Nonenrolled Versus Enrolled Infants per Gestational Week

| <b>Gestational week</b>                                                  | <b>22 weeks</b>                                  | <b>23 weeks</b>                                  | <b>24 weeks*</b>                                     | <b>25 weeks</b>                                  | <b>26 weeks</b>                                  |
|--------------------------------------------------------------------------|--------------------------------------------------|--------------------------------------------------|------------------------------------------------------|--------------------------------------------------|--------------------------------------------------|
| <b>Number of infants</b><br>Non-enrolled/enrolled                        | 196/134                                          | 496/720                                          | 718/1652                                             | 693/1806                                         | 718/2233                                         |
| <b>BPD, n; % (95%CI)</b><br>Non-enrolled/enrolled, p-value               | 9; 4.4 (2-8) /<br>81; 60.4 (52-69)<br><0.001     | 60, 12.4 (10-16)<br>394, 54.8 (51-58)<br><0.001  | 113, 16.1 (14-19)<br>781, 47.3 (45-50)<br><0.001     | 100, 14.7 (12-18)<br>627, 34.7 (33-37)<br><0.001 | 91, 12.7 (11-15)<br>596, 26.7 (25-29)<br><0.001  |
| <b>BPD or death, n, % (95%CI)</b><br>Non-enrolled/enrolled               | 186; 94.9 (91-97)<br>110; 82.1 (75-88)<br><0.001 | 427, 86.4 (83-89)<br>516, 71.7 (68-75)<br><0.001 | 474, 66.1 (63-70)<br>959, 58.1 (56-60)<br><0.001     | 383, 55.7 (52-59)<br>745, 41.3 (39-44)<br><0.001 | 284, 39.7 (36-43)<br>654, 29.3 (28-31)<br><0.001 |
| <b>Death in hospital, all cause, n, % (95%CI), Non-enrolled/enrolled</b> | 179; 91.3 (87-95)<br>31; 23.1 (17-31)<br><0.001  | 379, 76.7 (73-80)<br>138, 19.2 (16-22)<br><0.001 | 380, 53.1 (49-57)<br>212, 12.8 (11.3-14.5)<br><0.001 | 290, 42.2 (39-46)<br>146, 8.1 (7-9)<br><0.001    | 200, 28.0 (25-31)<br>86, 3.9 (3-5)<br><0.001     |
| <b>ICH, n, % (95%CI)</b><br>Non-enrolled/enrolled                        | 5; 40.8 (32-50)<br>73; 54.2 (46-63)<br>0.034     | 219, 50.8 (46-56)<br>338, 47.1 (43-51)<br>0.2    | 308, 45.0 (41-49)<br>635, 38.6 (36-41)<br>0.004      | 268, 39.8 (36-44)<br>562, 31.2 (29-32)<br><0.001 | 194, 27.4 (24-31)<br>567, 25.4 (24-27)<br>0.28   |

ICH database for non-enrolled infants: 22 wk: 12, 23 wk: 431, 24 wk: 685, 25 wk: 674, 26 wk: 707.

p-values were derived from Chi-square test as comparison of enrolled vs. non-enrolled infants
