# Supplementary material for: Association of Administration of Surfactant Using Less Invasive Methods With Outcomes in Extremely Preterm Infants Less Than 27 Weeks of Gestation
Source: PubMed Central journal article supplement (PMC9364126; doi:10.1001/jamanetworkopen.2022.25810), 2022-08-09
Supplement: jamanetwopen-e2225810-s002.pdf [file jamanetwopen-e2225810-s002.pdf]

\*First name, last name, and suffix (if applicable) are required and will appear in PubMed.

| <b>*Group Name(s): The German Neonatal Network</b> |                   |                              |                         |                                                                           |                                                 |                                                                |                                                                                                   |
|----------------------------------------------------|-------------------|------------------------------|-------------------------|---------------------------------------------------------------------------|-------------------------------------------------|----------------------------------------------------------------|---------------------------------------------------------------------------------------------------|
| <b>*First Name and Middle Initial(s)</b>           | <b>*Last Name</b> | <b>*Suffix (eg, Jr, III)</b> | <b>Academic Degrees</b> | <b>Institution</b>                                                        | <b>Location (city, state/province, country)</b> | <b>Role or Contribution, eg, chair, principal investigator</b> | <b>Group (if more than 1 Group listed in the byline) and/or Subgroup (eg, Steering Committee)</b> |
| Kirstin                                            | Faust             |                              | MD                      | Klinik für Kinder- und Jugendmedizin, UKSH Campus Lübeck                  | Lübeck                                          | site investigator, patient enrollment                          |                                                                                                   |
| Dirk                                               | Müller            |                              | MD                      | Klinikum Kassel, Kinderklinik - Neonatologie                              | Kassel                                          | site investigator, patient enrollment                          |                                                                                                   |
| Corinna                                            | Gebauer           |                              | MD                      | Universitätsklinikum Leipzig, Klinik für Kinder und Jugendliche           | Leipzig                                         | site investigator, patient enrollment                          |                                                                                                   |
| Florian                                            | Guthmann          |                              | MD                      | Kinderkrankenhaus auf der Bult                                            | Hannover                                        | site investigator, patient enrollment                          |                                                                                                   |
| Axel                                               | von der Wense     |                              | MD                      | Altonaer Kinderkrankenhaus e.V.                                           | Hamburg                                         | site investigator, patient enrollment                          |                                                                                                   |
| Oliver                                             | Stangl            |                              | MD                      | Klinikum Aschaffenburg-Alzenau, Klinik für Kinder- und Jugendmedizin      | Aschaffenburg                                   | site investigator, patient enrollment                          |                                                                                                   |
| Ursula                                             | Weller            |                              | MD                      | Evangelisches Krankenhaus Bielefeld, Klinik für Kinder- und Jugendmedizin | Bielefeld                                       | site investigator, patient enrollment                          |                                                                                                   |
| Thomas                                             | Höhn              |                              | MD                      | Universität Düsseldorf, Klinik für Allgemeine Pädiatrie                   | Düsseldorf                                      | site investigator, patient enrollment                          |                                                                                                   |
| Dirk                                               | Olbertz           |                              | MD                      | Klinikum Südstadt Rostock, Abteilung für Neonatologie                     | Rostock                                         | site investigator, patient enrollment                          |                                                                                                   |
| Ursula                                             | Felderhoff-Müser  |                              | MD                      | Universitätskinderklinik Essen                                            | Essen                                           | site investigator, patient enrollment                          |                                                                                                   |
| Rainer                                             | Rossi             |                              | MD                      | Vivantes Krankenhaus Neukölln, Kinder- und Jugendmedizin                  | Berlin                                          | site investigator, patient enrollment                          |                                                                                                   |

## Supplemental Online Content: Nonauthor Collaborators

\*First name, last name, and suffix (if applicable) are required and will appear in PubMed.

| *First Name and Middle Initial(s) | *Last Name         | *Suffix (eg, Jr, III) | Academic Degrees | Institution                                                                                                                           | Location (city, state/province, country) | Role or Contribution, eg, chair, principal investigator | Group (if more than 1 Group listed in the byline) and/or Subgroup (eg, Steering Committee) |
|-----------------------------------|--------------------|-----------------------|------------------|---------------------------------------------------------------------------------------------------------------------------------------|------------------------------------------|---------------------------------------------------------|--------------------------------------------------------------------------------------------|
| Norbert                           | Teig               |                       | MD               | St. Elisabeth-Hospital, Klinikum der Ruhr-Universität Bochum, Klinik für Kinder und Jugendmedizin                                     | Bochum                                   | site investigator, patient enrollment                   |                                                                                            |
| Friedhelm                         | Heitmann           |                       | MD               | Klinikum Dortmund, Klinik für Kinder und Jugendmedizin                                                                                | Dortmund                                 | site investigator, patient enrollment                   |                                                                                            |
| Matthias                          | Heckmann           |                       | MD               | Ernst-Moritz-Arndt-Universität, Klinik & Poliklinik für Kinder- und Jugendmedizin                                                     | Greifswald                               | site investigator, patient enrollment                   |                                                                                            |
| Reinhard                          | Laux               |                       | MD               | Asklepios Klinik Barmbek, Neonatologie                                                                                                | Hamburg                                  | site investigator, patient enrollment                   |                                                                                            |
| Bettina                           | Bohnhorst          |                       | MD               | Medizinische Hochschule Hannover, Kinderklinik I                                                                                      | Hannover                                 | site investigator, patient enrollment                   |                                                                                            |
| Bernd                             | Roth               |                       | MD               | Klinikum der Universität zu Köln, Klinik und Poliklinik für Allgemeine Kinderheilkunde, Neonatologie und Pädiatrische Intensivmedizin | Köln                                     | site investigator, patient enrollment                   |                                                                                            |
| Matthias                          | Vochem             |                       | MD               | Olgahospital Stuttgart, Klinik für Kinder- und Jugendmedizin                                                                          | Stuttgart                                | site investigator, patient enrollment                   |                                                                                            |
| Annette                           | Keller-Wackerbauer |                       | MD               | Kinderklinik St. Hedwig                                                                                                               | Regensburg                               | site investigator, patient enrollment                   |                                                                                            |
| Jens                              | Möller             |                       | MD               | Klinikum Saarbrücken gGmbH, Klinik für Kinder- und Jugendmedizin                                                                      | Saarbrücken                              | site investigator, patient enrollment                   |                                                                                            |
| Joachim                           | Eichhorn           |                       | MD               | Klinikum Leverkusen, Klinik für Kinder und Jugendliche                                                                                | Leverkusen                               | site investigator, patient enrollment                   |                                                                                            |
| Jürgen                            | Wintgens           |                       | MD               | Städtische Kliniken Mönchengladbach GmbH                                                                                              | Mönchengladbach                          | site investigator, patient enrollment                   |                                                                                            |
| Ralf                              | Böttger            |                       | MD               | Universitätskinderklinik Magdeburg, Perinatalzentrum                                                                                  | Magdeburg                                | site investigator, patient enrollment                   |                                                                                            |

## Supplemental Online Content: Nonauthor Collaborators

\*First name, last name, and suffix (if applicable) are required and will appear in PubMed.

| *First Name and Middle Initial(s) | *Last Name | *Suffix (eg, Jr, III) | Academic Degrees | Institution                                                               | Location (city, state/province, country) | Role or Contribution, eg, chair, principal investigator | Group (if more than 1 Group listed in the byline) and/or Subgroup (eg, Steering Committee) |
|-----------------------------------|------------|-----------------------|------------------|---------------------------------------------------------------------------|------------------------------------------|---------------------------------------------------------|--------------------------------------------------------------------------------------------|
| Jochen                            | Reese      |                       | MD               | Ostholstein Kliniken, Kinderklinik Eutin                                  | Eutin                                    | site investigator, patient enrollment                   |                                                                                            |
| Mechthild                         | Hubert     |                       | MD               | DRK-Kinderklinik Siegen, Pädiatrie                                        | Siegen                                   | site investigator, patient enrollment                   |                                                                                            |
| Michael                           | Dördelmann |                       | MD               | Diakonissenkrankenhaus, Klinik für Kinder- u. Jugendmedizin               | Flensburg                                | site investigator, patient enrollment                   |                                                                                            |
| Georg                             | Hillebrand |                       | MD               | Klinikum Itzehoe, Kinderklinik                                            | Itzehoe                                  | site investigator, patient enrollment                   |                                                                                            |
| Claudia                           | Roll       |                       | MD               | Universität Witten/Herdecke, Vestischen Kinder- und Jugendklinik Datteln  | Datteln                                  | site investigator, patient enrollment                   |                                                                                            |
| Reinhard                          | Jensen     |                       | MD               | Westküstenklinikum Heide, Klinik für Kinder- u. Jugendmedizin             | Heide                                    | site investigator, patient enrollment                   |                                                                                            |
| Jens                              | Möller     |                       | MD               | Universitätsklinikum des Saarlandes, Klinik für Kinder- und Jugendmedizin | Homburg                                  | site investigator, patient enrollment                   |                                                                                            |
| Mario                             | Rüdiger    |                       | MD               | Universitätsklinikum Carl Gustav Carus, Neonatologie u. Intensivmedizin   | Dresden                                  | site investigator, patient enrollment                   |                                                                                            |
| Claudius                          | Werner     |                       | MD               | Kinderklinik der Westfälische Wilhelms-Universität Münster                | Münster                                  | site investigator, patient enrollment                   |                                                                                            |
| Ann Carolin                       | Longardt   |                       | MD               | UKSH Campus Kiel, Klinik für Allgemeine Pädiatrie                         | Kiel                                     | site investigator, patient enrollment                   |                                                                                            |
| Stefan                            | Schäfer    |                       | MD               | Klinikum Nürnberg Süd, Zentrum für Neugeborene, Kinder u. Jugendliche     | Nürnberg                                 | site investigator, patient enrollment                   |                                                                                            |
| Thomas                            | Schaible   |                       | MD               | Klinikum Mannheim, Kinderklinik                                           | Mannheim                                 | site investigator, patient enrollment                   |                                                                                            |

## Supplemental Online Content: Nonauthor Collaborators

\*First name, last name, and suffix (if applicable) are required and will appear in PubMed.

| *First Name and Middle Initial(s) | *Last Name | *Suffix (eg, Jr, III) | Academic Degrees | Institution                                                                             | Location (city, state/province, country) | Role or Contribution, eg, chair, principal investigator | Group (if more than 1 Group listed in the byline) and/or Subgroup (eg, Steering Committee) |
|-----------------------------------|------------|-----------------------|------------------|-----------------------------------------------------------------------------------------|------------------------------------------|---------------------------------------------------------|--------------------------------------------------------------------------------------------|
| Axel                              | Franz      |                       | MD               | Universitätsklinik für Kinder- und Jugendmedizin Tübingen, Abtlg. Neonatologie          | Tübingen                                 | site investigator, patient enrollment                   |                                                                                            |
| Michael                           | Heldmann   |                       | MD               | Helios Klinik Wuppertal, Zentrum für Kinder und Jugendmedizin, Neonatologie             | Wuppertal                                | site investigator, patient enrollment                   |                                                                                            |
| Steffen                           | Kunzmann   |                       | MD               | Bürgerhospital, Verein Frankfurter Stiftungskrankenhäuser, Neonatologie                 | Frankfurt                                | site investigator, patient enrollment                   |                                                                                            |
| Esther                            | Schmidt    |                       | MD               | HELIOS Klinik Schwerin                                                                  | Schwerin                                 | site investigator, patient enrollment                   |                                                                                            |
| Thorsten                          | Orlikowsky |                       | MD               | Universitätsklinikum Aachen, Klinik für Kinder- und Jugendmedizin, Sektion Neonatologie | Aachen                                   | site investigator, patient enrollment                   |                                                                                            |
| Hubert                            | Gerleve    |                       | MD               | St. Vinzenzhospital, Kinder- und Jugendklinik                                           | Coesfeld                                 | site investigator, patient enrollment                   |                                                                                            |
| Nico                              | Depping    |                       | MD               | St. Marienhospital Bonn                                                                 | Bonn                                     | site investigator, patient enrollment                   |                                                                                            |
| Roland                            | Haase      |                       | MD               | Universitätsklinikum Halle, Poliklinik für Kinder- und Jugendmedizin                    | Halle (Saale)                            | site investigator, patient enrollment                   |                                                                                            |
| Marc                              | Hoppenz    |                       | MD               | Kliniken der Stadt Köln, Kinderkrankenhaus Amsterdamer Straße - Neonatologie            | Köln                                     | site investigator, patient enrollment                   |                                                                                            |
| Stephan                           | Seeliger   |                       | MD               | Klinikum St. Elisabeth, Klinik für Kinder- und Jugendmedizin                            | Neuburg/Donau                            | site investigator, patient enrollment                   |                                                                                            |

## Supplemental Online Content: Nonauthor Collaborators

\*First name, last name, and suffix (if applicable) are required and will appear in PubMed.

| *First Name and Middle Initial(s) | *Last Name | *Suffix (eg, Jr, III) | Academic Degrees | Institution                                                                                                                | Location (city, state/province, country) | Role or Contribution, eg, chair, principal investigator | Group (if more than 1 Group listed in the byline) and/or Subgroup (eg, Steering Committee) |
|-----------------------------------|------------|-----------------------|------------------|----------------------------------------------------------------------------------------------------------------------------|------------------------------------------|---------------------------------------------------------|--------------------------------------------------------------------------------------------|
| Helmut                            | Küster     |                       | MD               | Georg-August-Universität Göttingen, Pädiatrische Kardiologie und Intensivmedizin                                           | Göttingen                                | site investigator, patient enrollment                   |                                                                                            |
| Hans                              | Fuchs      |                       | MD               | Universitätsklinikum Freiburg, Zentrum für Kinder- u. Jugendmedizin Neonatologie / intensivmedizin                         | Freiburg                                 | site investigator, patient enrollment                   |                                                                                            |
| Thorsten                          | Körner     |                       | MD               | Klinikum Links der Weser GmbH, Klinik für Kinder- und Jugendmedizin, Abt. f. Neonatologie und Pädiatrische Intensivmedizin | Bremen                                   | site investigator, patient enrollment                   |                                                                                            |
| Thomas                            | Brune      |                       | MD               | Klinikum Lippe GmbH, Klinik für Kinder- und Jugendmedizin                                                                  | Detmold                                  | site investigator, patient enrollment                   |                                                                                            |
| Andreas                           | Müller     |                       | MD               | Universitätsklinikum Bonn (AÖR), Zentrum für Kinderheilkunde                                                               | Bonn                                     | site investigator, patient enrollment                   |                                                                                            |
| Florian                           | Urlichs    |                       | MD               | St. Franziskus-Hospital Münster, Neonatologie und Kinderintensivmedizin                                                    | Münster                                  | site investigator, patient enrollment                   |                                                                                            |
| Martin                            | Berghäuser |                       | MD               | Florence-Nightingale Krankenhaus, Kinderklinik / Neonatologie und Päd. Intensivmedizin                                     | Düsseldorf                               | site investigator, patient enrollment                   |                                                                                            |
| Hans                              | Proquitté  |                       | MD               | Universitätsklinikum Jena, Klinik für Kinder- und Jugendmedizin, Sektion Neonatologie                                      | Jena                                     | site investigator, patient enrollment                   |                                                                                            |
| Patrick                           | Morhart    |                       | MD               | Universitätsklinikum Erlangen, Neonatologie                                                                                | Erlangen                                 | site investigator, patient enrollment                   |                                                                                            |

## Supplemental Online Content: Nonauthor Collaborators

\*First name, last name, and suffix (if applicable) are required and will appear in PubMed.

| *First Name and Middle Initial(s) | *Last Name       | *Suffix (eg, Jr, III) | Academic Degrees | Institution                                                                                                       | Location (city, state/province, country) | Role or Contribution, eg, chair, principal investigator | Group (if more than 1 Group listed in the byline) and/or Subgroup (eg, Steering Committee) |
|-----------------------------------|------------------|-----------------------|------------------|-------------------------------------------------------------------------------------------------------------------|------------------------------------------|---------------------------------------------------------|--------------------------------------------------------------------------------------------|
| Wolfgang                          | Lindner          |                       | MD               | Universitätsklinikum Ulm, Klinik für Kinder- und Jugendmedizin                                                    | Ulm                                      | site investigator, patient enrollment                   |                                                                                            |
| Rolf                              | Schlösser        |                       | MD               | Universitätsklinik Frankfurt                                                                                      | Frankfurt                                | site investigator, patient enrollment                   |                                                                                            |
| Welfhard                          | Schneider        |                       | MD               | Vivantes Klinikum am Friedrichshain                                                                               | Berlin                                   | site investigator, patient enrollment                   |                                                                                            |
| Michael                           | Schroth          |                       | MD               | Cnopf'sche Kinderklinik Nürnberg                                                                                  | Nürnberg                                 | site investigator, patient enrollment                   |                                                                                            |
| Esther                            | Rieger-Fackeldey |                       | MD               | Klinikum rechts der Isar der Technischen Universität München; Abteilung für Neonatologie und Päd. Intensivmedizin | München                                  | site investigator, patient enrollment                   |                                                                                            |
| Frank                             | Dohle            |                       | MD               | St. Vincenz-Krankenhaus Paderborn Klinik für Kinder- und Jugendmedizin                                            | Paderborn                                | site investigator, patient enrollment                   |                                                                                            |
| Gernot                            | Sinnecker        |                       | MD               | Klinikum Wolfsburg                                                                                                | Wolfsburg                                | site investigator, patient enrollment                   |                                                                                            |
| Florian                           | Urlich           |                       | MD               | Christliches Kinderhospital Osnabrück GmbH Zentrum für Kinder- und Jugendmedizin                                  | Osnabrück                                | site investigator, patient enrollment                   |                                                                                            |
| Thomas                            | Völkl            |                       | MD               | Klinik für Kinder und Jugendliche Josefinum Augsburg                                                              | Augsburg                                 | site investigator, patient enrollment                   |                                                                                            |
| Francisco                         | Brevis Nunez     |                       | MD               | Sana Kliniken Duisburg GmbH                                                                                       | Duisburg                                 | site investigator, patient enrollment                   |                                                                                            |
| Michael                           | Welsch           |                       | MD               | DONAUISAR Klinikum                                                                                                | Deggendorf                               | site investigator, patient enrollment                   |                                                                                            |
| Marcus                            | Krüger           |                       | MD               | München Klinik Harlaching                                                                                         | München Harlaching                       | site investigator, patient enrollment                   |                                                                                            |

Supplemental Online Content: Nonauthor Collaborators

\*First name, last name, and suffix (if applicable) are required and will appear in PubMed.

| <b>*First Name and Middle Initial(s)</b> | <b>*Last Name</b> | <b>*Suffix (eg, Jr, III)</b> | Academic Degrees | Institution                   | Location (city, state/province, country) | Role or Contribution, eg, chair, principal investigator | Group (if more than 1 Group listed in the byline) and/or Subgroup (eg, Steering Committee) |
|------------------------------------------|-------------------|------------------------------|------------------|-------------------------------|------------------------------------------|---------------------------------------------------------|--------------------------------------------------------------------------------------------|
|                                          |                   |                              | MD               | Universitätsklinikum Würzburg | Würzburg                                 | site investigator, patient enrollment                   |                                                                                            |
